# Supplementary material for: Astragaloside IV ameliorates diabetic nephropathy in db/db mice by inhibiting NLRP3 inflammasome-mediated inflammation
Source: PubMed Central journal article supplement — Int J Mol Med. 2021 Jul 5;48(2):164. doi: 10.3892/ijmm.2021.4996 (PMC8262660; doi:10.3892/ijmm.2021.4996), 2021-07-05

Figure S1. Representative images of synaptopodin expression (green) during differentiation of podocytes. (A) The synaptopodin expression of podocytes at 37°C in medium without recombinant murine  $\gamma$ -interferon for 2 days. (B) The synaptopodin expression of podocytes at 37°C in medium without recombinant murine  $\gamma$ -interferon for 10 days (scale bar, 50  $\mu$ m; magnification, x200).

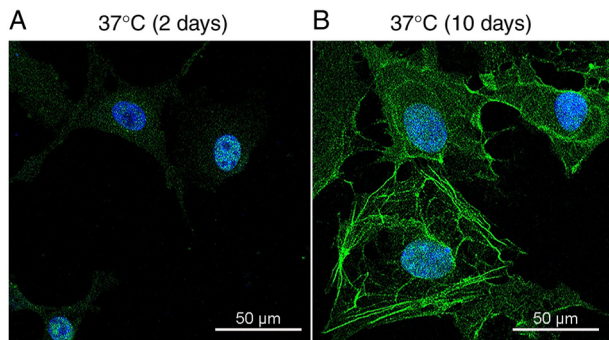

Supplement: Supplementary_Data.pdf [file Supplementary_Data.pdf]
